# Supplementary material for: Identification and analysis of lncRNA, microRNA and mRNA expression profiles and construction of ceRNA network in Talaromyces marneffei-infected THP-1 macrophage
Source: PeerJ. 2021 Jan 13;9:e10529. doi: 10.7717/peerj.10529 (PMC7811284; doi:10.7717/peerj.10529)
Supplement: Supplemental Information 1 [file peerj-09-10529-s001.xlsx]

## Sheet: 工作表1
	mRNA		lncRNA
	CSF1	NR4A3	IL6R-AS1	LINC02009	AC090197.1	AC006252.1
M	0.884672	0.9562	0.949959	1.17638	0.934132	1.0236
	1.05757	1.1256	1.06245	0.736266	1.01048	1.01589
	1.06883	0.9936	0.990799	1.15456	1.05941	0.961657
MT	4.52607	1.8565	3.53419	10.5355	2.33183	1.23244
	4.65324	2.4585	2.9815	8.20819	5.49432	1.41013
	4.30222	2.0564	3.58659	6.51995	2.92114	2.41126
